# Supplementary material for: So gelingt Diversity!
Source: Springer Nature journal article supplement (doi:10.1007/s41906-023-2081-y), 2023-05-16

# Abbildung 1

## zum Beitrag „So gelingt Diversity!“

von Eva Obernauer, Simon Lang

PflegeZeitschrift (76) 6/2023, S. 34-36

Abb. 1: Positive Aspekte des Organisationsentwicklungsprozesses

Durch die Teilnahme meiner Einrichtung am Projekt  
„Qualitätssiegel Lebensort Vielfalt“ ...

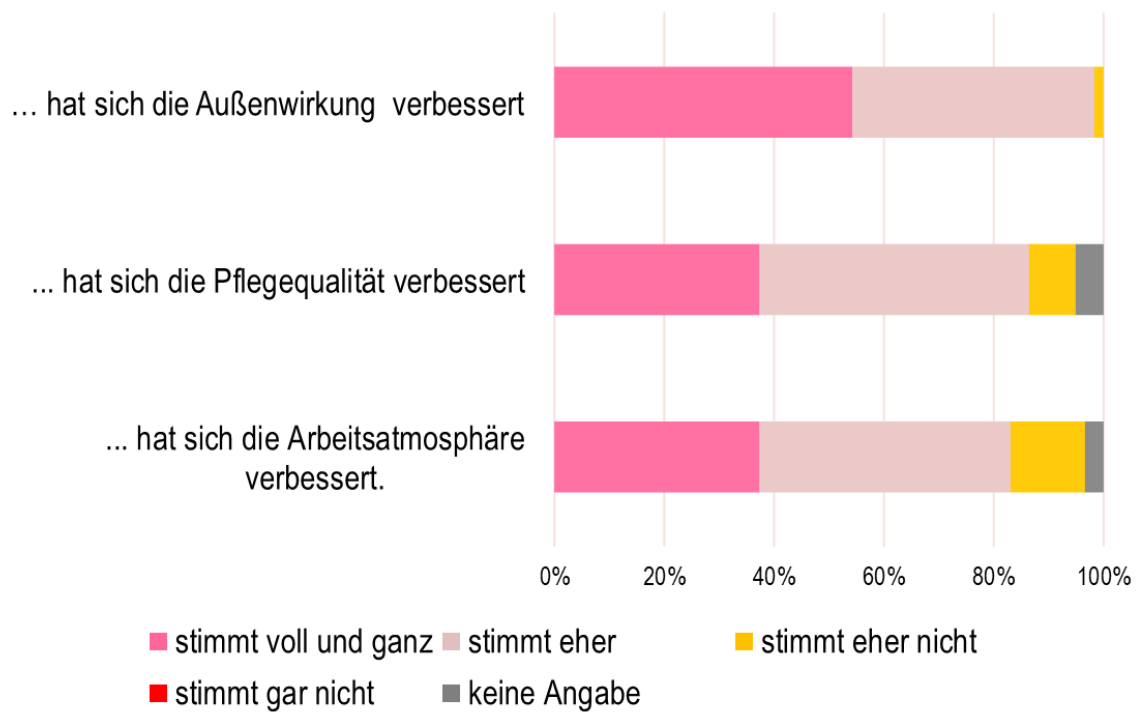

Supplement: MOESM1 [file 25370950]
